# Supplementary material for: Language-Based Detection of Depression with Machine Learning: Systematic Review and Meta- Analysis
Source: Research Square preprint supplement (doi:10.21203/rs.3.rs-8067325/v1), 2025-11-18
Supplement: Supplementary file 1 [file 78c86710b4b5b51b7645fa0f.docx]

**Language-Based Detection of Depression with Machine Learning: Systematic Review and Meta-Analysis**

**Supplementary Tables and Figures**

**Table S1. PRISMA checklist**

| **Section and Topic** | **Item #** | **Checklist item** | **Location where item is reported** |
| --- | --- | --- | --- |
| **TITLE** | | |  |
| Title | 1 | Identify the report as a systematic review. | Title p.1 |
| **ABSTRACT** | | |  |
| Abstract | 2 | See the PRISMA 2020 for Abstracts checklist. | Abstract p. 2 |
| **INTRODUCTION** | | |  |
| Rationale | 3 | Describe the rationale for the review in the context of existing knowledge. | Intro p. 3 |
| Objectives | 4 | Provide an explicit statement of the objective(s) or question(s) the review addresses. | Intro p. 3 |
| **METHODS** | | |  |
| Eligibility criteria | 5 | Specify the inclusion and exclusion criteria for the review and how studies were grouped for the syntheses. | Methods pp. 4-5 |
| Information sources | 6 | Specify all databases, registers, websites, organisations, reference lists and other sources searched or consulted to identify studies. Specify the date when each source was last searched or consulted. | Methods p. 4 |
| Search strategy | 7 | Present the full search strategies for all databases, registers and websites, including any filters and limits used. | Methods p. 4 |
| Selection process | 8 | Specify the methods used to decide whether a study met the inclusion criteria of the review, including how many reviewers screened each record and each report retrieved, whether they worked independently, and if applicable, details of automation tools used in the process. | Methods p. 4 |
| Data collection process | 9 | Specify the methods used to collect data from reports, including how many reviewers collected data from each report, whether they worked independently, any processes for obtaining or confirming data from study investigators, and if applicable, details of automation tools used in the process. | Methods pp. 5-6 |
| Data items | 10a | List and define all outcomes for which data were sought. Specify whether all results that were compatible with each outcome domain in each study were sought (e.g. for all measures, time points, analyses), and if not, the methods used to decide which results to collect. | Methods pp. 6-7 |
| 10b | List and define all other variables for which data were sought (e.g. participant and intervention characteristics, funding sources). Describe any assumptions made about any missing or unclear information. | Methods pp. 6-7 |
| Study risk of bias assessment | 11 | Specify the methods used to assess risk of bias in the included studies, including details of the tool(s) used, how many reviewers assessed each study and whether they worked independently, and if applicable, details of automation tools used in the process. | Methods pp. 5-6 |
| Effect measures | 12 | Specify for each outcome the effect measure(s) (e.g. risk ratio, mean difference) used in the synthesis or presentation of results. | Methods pp. 6-7 |
| Synthesis methods | 13a | Describe the processes used to decide which studies were eligible for each synthesis (e.g. tabulating the study intervention characteristics and comparing against the planned groups for each synthesis (item #5)). | Methods pp. 7-8 |
| 13b | Describe any methods required to prepare the data for presentation or synthesis, such as handling of missing summary statistics, or data conversions. | Methods pp. 7-8 |
| 13c | Describe any methods used to tabulate or visually display results of individual studies and syntheses. | Methods pp. 7-8 |
| 13d | Describe any methods used to synthesize results and provide a rationale for the choice(s). If meta-analysis was performed, describe the model(s), method(s) to identify the presence and extent of statistical heterogeneity, and software package(s) used. | Methods pp. 7-8 |
| 13e | Describe any methods used to explore possible causes of heterogeneity among study results (e.g. subgroup analysis, meta-regression). | Methods pp. 7-8 |
| 13f | Describe any sensitivity analyses conducted to assess robustness of the synthesized results. | Methods pp. 7-8 |
| Reporting bias assessment | 14 | Describe any methods used to assess risk of bias due to missing results in a synthesis (arising from reporting biases). | Methods pp. 7-8 |
| Certainty assessment | 15 | Describe any methods used to assess certainty (or confidence) in the body of evidence for an outcome. | Methods pp. 7-8 |
| **RESULTS** | | |  |
| Study selection | 16a | Describe the results of the search and selection process, from the number of records identified in the search to the number of studies included in the review, ideally using a flow diagram. | Results p. 8 |
| 16b | Cite studies that might appear to meet the inclusion criteria, but which were excluded, and explain why they were excluded. | Figure 1 |
| Study characteristics | 17 | Cite each included study and present its characteristics. | Results pp. 8-11 and Tables 1 and 2 |
| Risk of bias in studies | 18 | Present assessments of risk of bias for each included study. | Table S2 |
| Results of individual studies | 19 | For all outcomes, present, for each study: (a) summary statistics for each group (where appropriate) and (b) an effect estimate and its precision (e.g. confidence/credible interval), ideally using structured tables or plots. | Tables 1 and 2, all figures |
| Results of syntheses | 20a | For each synthesis, briefly summarise the characteristics and risk of bias among contributing studies. | Results pp. 8-12 |
| 20b | Present results of all statistical syntheses conducted. If meta-analysis was done, present for each the summary estimate and its precision (e.g. confidence/credible interval) and measures of statistical heterogeneity. If comparing groups, describe the direction of the effect. | Results pp. 10-12 |
| 20c | Present results of all investigations of possible causes of heterogeneity among study results. | Results pp. 10-12 |
| 20d | Present results of all sensitivity analyses conducted to assess the robustness of the synthesized results. | Results pp. 10-11 |
| Reporting biases | 21 | Present assessments of risk of bias due to missing results (arising from reporting biases) for each synthesis assessed. | Results pp. 10-12 |
| Certainty of evidence | 22 | Present assessments of certainty (or confidence) in the body of evidence for each outcome assessed. | Results pp. 10-12 |
| **DISCUSSION** | | |  |
| Discussion | 23a | Provide a general interpretation of the results in the context of other evidence. | Discussion pp. 12-13 |
| 23b | Discuss any limitations of the evidence included in the review. | Discussion pp. 13-14 |
| 23c | Discuss any limitations of the review processes used. | Discussion pp. 13-14 |
| 23d | Discuss implications of the results for practice, policy, and future research. | Discussion p. 14-15 |
| **OTHER INFORMATION** | | |  |
| Registration and protocol | 24a | Provide registration information for the review, including register name and registration number, or state that the review was not registered. | Methods p. 4 |
| 24b | Indicate where the review protocol can be accessed, or state that a protocol was not prepared. | Methods p. 4 |
| 24c | Describe and explain any amendments to information provided at registration or in the protocol. | Methods p. 4 |
| Support | 25 | Describe sources of financial or non-financial support for the review, and the role of the funders or sponsors in the review. | Acknowledgements p. 16 |
| Competing interests | 26 | Declare any competing interests of review authors. | Competing Interests p. 16 |
| Availability of data, code and other materials | 27 | Report which of the following are publicly available and where they can be found: template data collection forms; data extracted from included studies; data used for all analyses; analytic code; any other materials used in the review. | p. 8 and p. 16 |

**Table S2. Quality Assessment of Studies Included in the Systematic Review and Meta-Analyses**

| **Study** | **Sample Size** | **Balanced Sample** | **Ground Truth** |
| --- | --- | --- | --- |
| Abilkaiyrkyzy 202429 | - | + | + |
| Aloshban 202130 | - | + | + |
| Antoniou 202231 | + | + | - |
| Banerjee 202132 | + | + | + |
| Boian 202533 | + | + | + |
| Burkhardt 202234 | + | ?/- | + |
| Cao 202535 | - | + | + |
| Chen 202436 (CMDC) (Same as Zou 2023) | - | + | + |
| Chen 202436 (EATD) (Same as Shen 2022)* | + | + | + |
| Cohen 202337 | - | + | + |
| Cook 201638 | + | + | + |
| deHond 202439 | + | - | + |
| Demiroglu 202040 | - | + | + |
| Demiroglu 202040 | - | + | + |
| Gao 2024a41 | + | + | + |
| Guo 202442 | + | + | + |
| Hayati 202244 | - | + | + |
| He 2022 (same data as Yuan 2021)44 | + | + | + |
| Howes 201445 | + | ? | + |
| Iyortsuun 202446 (Same as Shen 2022) | + | + | + |
| Joharee 202347 | + | + | + |
| Krishnamurti 202248 | + | - | + |
| Li 202349 | + | + | + |
| Liu 202250 | + | + | + |
| Morales 201680 | - | N/A | + |
| Munthuli 202351 | - | + | + |
| Nobles 201852 | - | + | - |
| Oh 202453 | - | + | + |
| Ohse 202454 | - | + | + |
| Orhan 201955 | - | + | + |
| Ozkanca 201881 | - | N/A | + |
| Parkeaw56 | + | + | + |
| Pérez-Toro 202257 | - | + | - |
| Podina 202558 | + | + | + |
| Qin 202515 | - | + | + |
| Ren 202459 | - | + | + |
| Resnik 201360 | + | + | + |
| Rutowski 202061 | + | + | + |
| Shen 202262 | + | + | + |
| Shin 202263 | + | + | + |
| Shin 202464 | - | + | + |
| Smirnova 201865 | + | + | + |
| Smirnova 201966 | + | + | + |
| Sood 202367 | + | + | + |
| Tao 202368 | + | + | + |
| Tlachac 202069 | + | + | + |
| Tlachac 202270 | + | + | + |
| Tlachac 202271 | ? | ? | + |
| Tlachac 202272 | - | + | + |
| Weber 202573 | - | N/A | + |
| Wright-Berryman 202374 | + | + | + |
| Xue 202475  (Same as Shen 2022) | + | + | + |
| Ye 202176 | + | + | + |
| Yuan 202177 | + | + | + |
| Zhang 202478 | + | + | + |
| Zou 202379 | - | + | + |

**Note.** N/A indicates studies using continuous predictions or item-level classifications rather than binary group outcomes, for which a balanced sample is not applicable. Each quality assessment criterion was rated as either positive (+) when fulfilled or negative (-) when not fulfilled.

**Table S3. Leave-One-Out Sensitivity Analyses for Pooled Classification Accuracy**

| **Study** | | **Accuracy** | **95% CI low** | **95% CI high** |
| --- | --- | --- | --- | --- |
| Abilkaiyrkyzy | 2024 | 0.802 | 0.765 | 0.835 |
| Aloshban | 2021 | 0.802 | 0.764 | 0.834 |
| Antoniou | 2022 | 0.801 | 0.763 | 0.834 |
| Boian | 2025 | 0.799 | 0.761 | 0.832 |
| Cook | 2016 | 0.805 | 0.770 | 0.836 |
| deHond | 2024 | 0.795 | 0.758 | 0.828 |
| Demiroglu | 2020a | 0.803 | 0.766 | 0.835 |
| Demiroglu | 2020b | 0.799 | 0.761 | 0.832 |
| Gao | 2023 | 0.795 | 0.759 | 0.827 |
| Guo | 2024 | 0.799 | 0.761 | 0.832 |
| Hayati | 2022 | 0.802 | 0.765 | 0.834 |
| Iyortsuun | 2024 | 0.804 | 0.768 | 0.836 |
| Joharee | 2023 | 0.802 | 0.765 | 0.835 |
| Li | 2023 | 0.799 | 0.761 | 0.832 |
| Munthuli | 2023 | 0.797 | 0.760 | 0.830 |
| Nobles | 2018 | 0.803 | 0.765 | 0.835 |
| Oh | 2024 | 0.800 | 0.763 | 0.833 |
| Ohse | 2024 | 0.797 | 0.760 | 0.830 |
| Orhan | 2019 | 0.798 | 0.761 | 0.831 |
| Parkeaw | 2025 | 0.801 | 0.763 | 0.834 |
| Pérez-Toro | 2022 | 0.803 | 0.766 | 0.835 |
| Podina | 2025 | 0.799 | 0.761 | 0.832 |
| Qin | 2025 | 0.800 | 0.763 | 0.833 |
| Ren | 2024 | 0.804 | 0.768 | 0.836 |
| Resnik | 2013 | 0.800 | 0.763 | 0.833 |
| Rutowski | 2020 | 0.801 | 0.764 | 0.834 |
| Shin | 2022 | 0.800 | 0.762 | 0.833 |
| Shin | 2024 | 0.797 | 0.760 | 0.830 |
| Smirnova | 2019 | 0.793 | 0.758 | 0.825 |
| Sood | 2023 | 0.797 | 0.760 | 0.830 |
| Tao | 2023 | 0.803 | 0.766 | 0.835 |
| Tlachac | 2020 | 0.800 | 0.763 | 0.833 |
| Tlachac | 2022a | 0.805 | 0.769 | 0.836 |
| Tlachac | 2022b | 0.802 | 0.765 | 0.835 |
| Tlachac | 2023 | 0.802 | 0.765 | 0.835 |
| Weber | 2025 | 0.799 | 0.762 | 0.832 |
| Wright-Berryman | 2023 | 0.803 | 0.766 | 0.835 |
| Ye | 2021 | 0.798 | 0.760 | 0.831 |
| Yuan | 2021 | 0.803 | 0.766 | 0.835 |
| Zhang | 2020a | 0.799 | 0.762 | 0.832 |
| Zhang | 2024a | 0.803 | 0.767 | 0.836 |
| Zhang | 2024c | 0.797 | 0.760 | 0.830 |
| Zou | 2022 | 0.797 | 0.760 | 0.829 |

**Table S4. Leave-One-Out Sensitivity Analyses for Pooled Classification Precision**

| **Study** | | **Accuracy** | **95% CI low** | **95% CI high** |
| --- | --- | --- | --- | --- |
| Cao | 2025 | 0.782 | 0.720 | 0.834 |
| Gao | 2023 | 0.768 | 0.706 | 0.821 |
| Guo | 2024 | 0.787 | 0.731 | 0.835 |
| Iyortsuun | 2024 | 0.777 | 0.712 | 0.830 |
| Li | 2023 | 0.768 | 0.706 | 0.821 |
| Tao | 2023 | 0.780 | 0.716 | 0.833 |
| Yuan | 2021 | 0.780 | 0.716 | 0.833 |
| Zhang | 2024a | 0.781 | 0.718 | 0.834 |
| Zou | 2022 | 0.773 | 0.709 | 0.826 |
| Burkhardt | 2022 | 0.782 | 0.720 | 0.834 |
| deHond | 2024 | 0.767 | 0.705 | 0.820 |
| Nobles | 2018 | 0.780 | 0.716 | 0.833 |
| Resnik | 2013 | 0.785 | 0.724 | 0.835 |
| Sood | 2023 | 0.775 | 0.710 | 0.829 |
| Tlachac | 2020 | 0.779 | 0.715 | 0.832 |
| Tlachac | 2022a | 0.785 | 0.724 | 0.835 |
| Wright-Berryman | 2023 | 0.780 | 0.717 | 0.833 |
| Zhang | 2024c | 0.776 | 0.712 | 0.830 |
| Aloshban | 2021 | 0.763 | 0.705 | 0.812 |
| Boian | 2025 | 0.776 | 0.711 | 0.830 |
| Cook | 2016 | 0.782 | 0.719 | 0.834 |
| Demiroglu | 2020a | 0.777 | 0.713 | 0.831 |
| Demiroglu | 2020b | 0.772 | 0.708 | 0.825 |
| Munthuli | 2023 | 0.769 | 0.706 | 0.822 |
| Ohse | 2024 | 0.774 | 0.710 | 0.828 |
| Parkeaw | 2025 | 0.777 | 0.712 | 0.831 |
| Podina | 2025 | 0.778 | 0.714 | 0.831 |
| Shin | 2024 | 0.778 | 0.714 | 0.832 |

**Table S5. Leave-One-Out Sensitivity Analyses for Pooled Classification Recall**

| **Study** | | **Accuracy** | **95% CI low** | **95% CI high** |
| --- | --- | --- | --- | --- |
| Cao | 2025 | 0.767 | 0.682 | 0.834 |
| Gao | 2023 | 0.751 | 0.668 | 0.820 |
| Guo | 2024 | 0.766 | 0.681 | 0.833 |
| Iyortsuun | 2024 | 0.768 | 0.684 | 0.835 |
| Li | 2023 | 0.757 | 0.671 | 0.826 |
| Tao | 2023 | 0.764 | 0.679 | 0.833 |
| Yuan | 2021 | 0.768 | 0.684 | 0.835 |
| Zhang | 2024a | 0.766 | 0.682 | 0.834 |
| Zou | 2022 | 0.755 | 0.670 | 0.823 |
| Burkhardt | 2022 | 0.771 | 0.689 | 0.836 |
| deHond | 2024 | 0.779 | 0.708 | 0.838 |
| Nobles | 2018 | 0.761 | 0.676 | 0.830 |
| Qin | 2025 | 0.761 | 0.676 | 0.830 |
| Resnik | 2013 | 0.770 | 0.687 | 0.836 |
| Rutowski | 2020 | 0.763 | 0.678 | 0.832 |
| Sood | 2023 | 0.761 | 0.675 | 0.830 |
| Tlachac | 2020 | 0.755 | 0.670 | 0.824 |
| Tlachac | 2022a | 0.749 | 0.667 | 0.817 |
| Tlachac | 2023 | 0.755 | 0.670 | 0.824 |
| Wright-Berryman | 2023 | 0.769 | 0.685 | 0.835 |
| Zhang | 2024c | 0.759 | 0.674 | 0.829 |
| Aloshban | 2021 | 0.771 | 0.689 | 0.836 |
| Boian | 2025 | 0.762 | 0.676 | 0.831 |
| Cook | 2016 | 0.774 | 0.695 | 0.837 |
| Demiroglu | 2020a | 0.765 | 0.681 | 0.833 |
| Demiroglu | 2020b | 0.763 | 0.678 | 0.832 |
| Munthuli | 2023 | 0.759 | 0.673 | 0.828 |
| Oh | 2024 | 0.751 | 0.668 | 0.819 |
| Ohse | 2024 | 0.760 | 0.674 | 0.829 |
| Pérez-Toro | 2022 | 0.768 | 0.684 | 0.835 |
| Podina | 2025 | 0.755 | 0.670 | 0.824 |
| Shin | 2022 | 0.765 | 0.680 | 0.833 |
| Shin | 2024 | 0.766 | 0.682 | 0.834 |

**Table S6. Leave-One-Out Sensitivity Analyses for Pooled Classification AUC**

| **Study** | | **Accuracy** | **95% CI low** | **95% CI high** |
| --- | --- | --- | --- | --- |
| Antoniou | 2022 | 0.789 | 0.698 | 0.859 |
| Burkhardt | 2022 | 0.795 | 0.707 | 0.862 |
| Cohen | 2023 | 0.800 | 0.720 | 0.861 |
| deHond | 2024 | 0.801 | 0.722 | 0.861 |
| Krishnamurti | 2022 | 0.778 | 0.687 | 0.849 |
| Liu | 2022 | 0.792 | 0.701 | 0.860 |
| Oh | 2024 | 0.781 | 0.689 | 0.852 |
| Pérez-Toro | 2022 | 0.792 | 0.703 | 0.860 |
| Qin | 2025 | 0.777 | 0.689 | 0.846 |
| Ren | 2024 | 0.797 | 0.710 | 0.862 |
| Rutowski | 2020 | 0.784 | 0.691 | 0.855 |
| Shin | 2022 | 0.773 | 0.686 | 0.842 |
| Wright-Berryman | 2023 | 0.789 | 0.697 | 0.858 |
| Zou | 2022 | 0.759 | 0.689 | 0.817 |

**Table S7. Leave-One-Out Sensitivity Analyses for Pooled Classification Balanced Accuracy**

| **Study** | | **Accuracy** | **95% CI low** | **95% CI high** |
| --- | --- | --- | --- | --- |
| Shin | 2022.000 | 0.705 | 0.620 | 0.778 |
| Oh | 2024.000 | 0.721 | 0.637 | 0.792 |
| Rutowski | 2020.000 | 0.712 | 0.625 | 0.785 |
| Wright-Berryman | 2023.000 | 0.738 | 0.675 | 0.792 |
| Pérez-Toro | 2022.000 | 0.716 | 0.631 | 0.788 |
| deHond | 2024.000 | 0.725 | 0.643 | 0.794 |
| Shin | 2024.000 | 0.708 | 0.622 | 0.782 |
| Munthuli | 2023.000 | 0.699 | 0.618 | 0.769 |
| Boian | 2025.000 | 0.708 | 0.622 | 0.781 |
| Cook | 2016.000 | 0.724 | 0.642 | 0.794 |
| Podina | 2025.000 | 0.702 | 0.619 | 0.774 |
| Tlachac | 2020.000 | 0.705 | 0.620 | 0.777 |
| Li | 2023.000 | 0.708 | 0.622 | 0.781 |
| Nobles | 2018.000 | 0.716 | 0.630 | 0.789 |
| Tlachac | 2023.000 | 0.717 | 0.632 | 0.789 |
| Tlachac | 2022a | 0.723 | 0.640 | 0.793 |

**
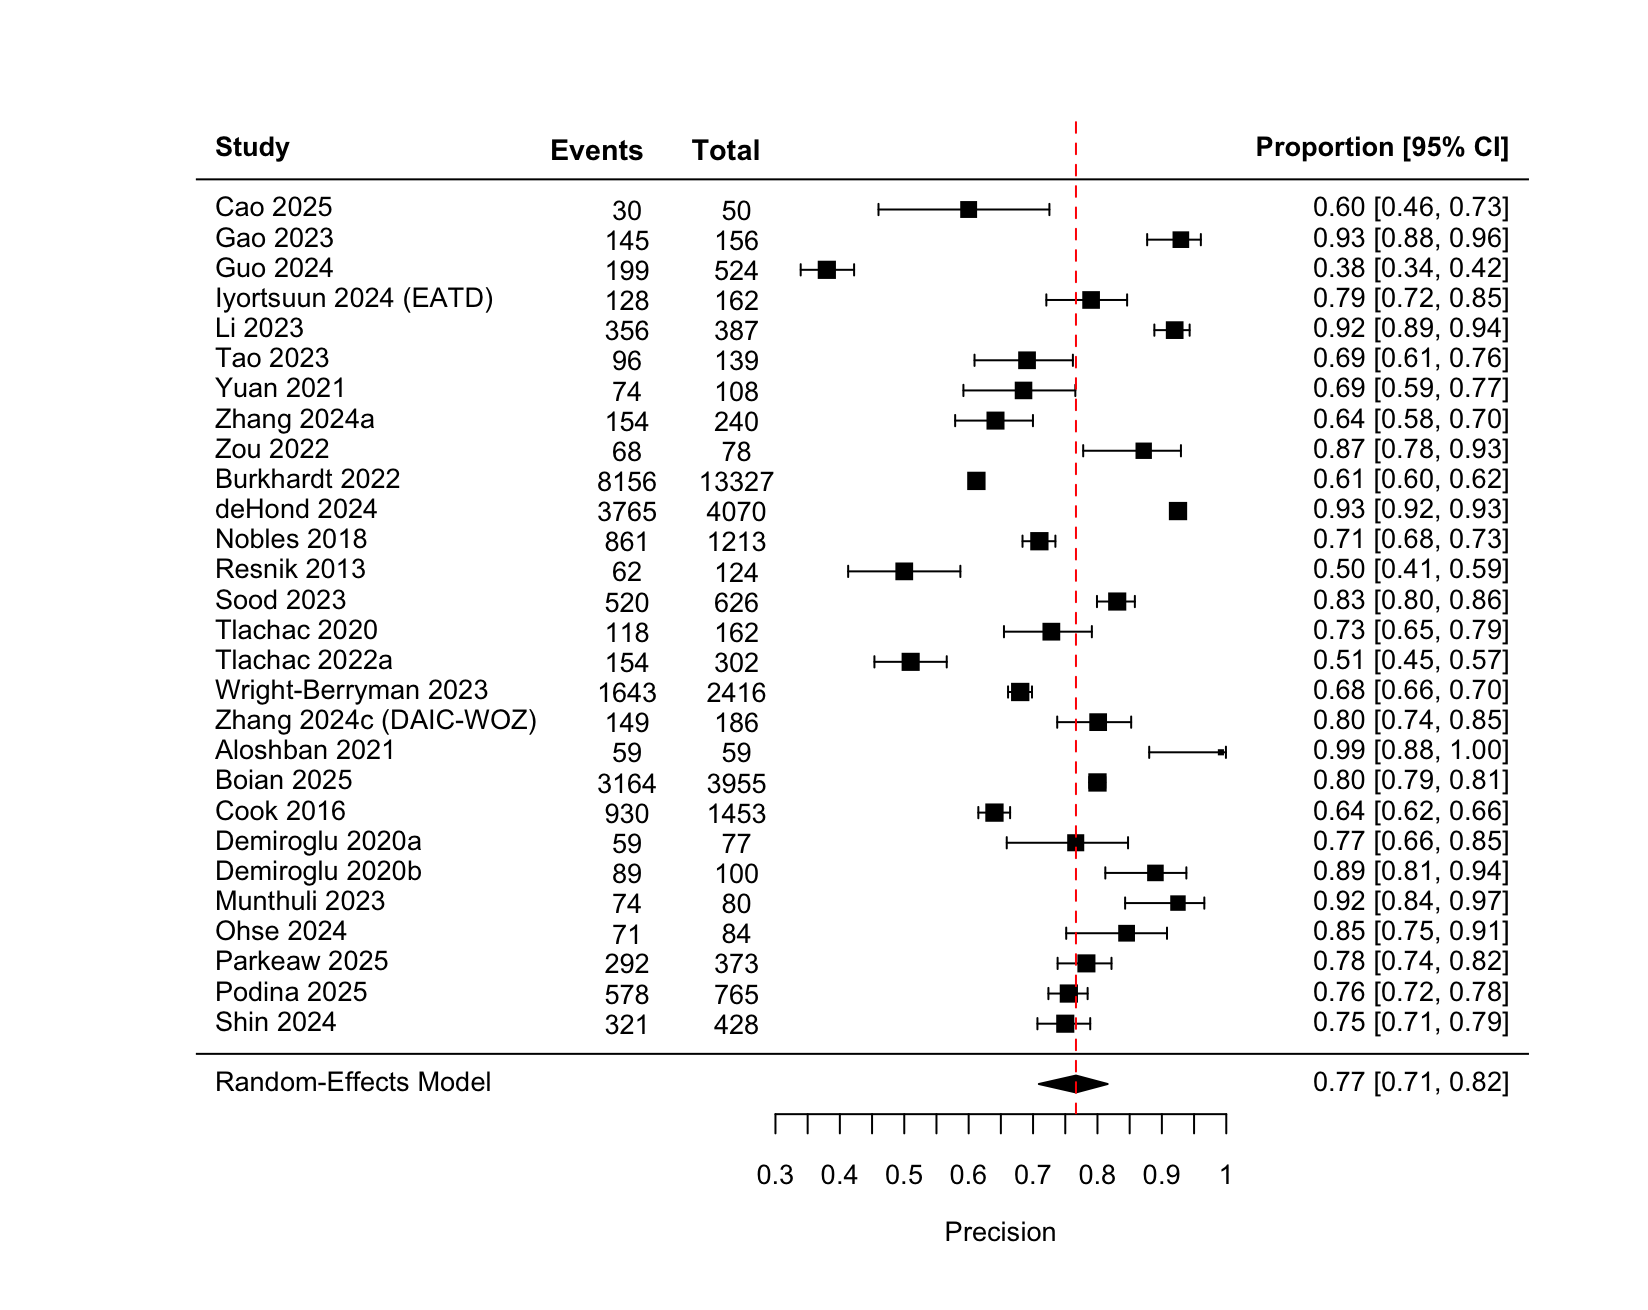
Figure S1. Forest Plot of Study-Level Classification Precision with Pooled Random-Effects Estimate**

**Figure S2. Forest Plot of Study-Level Classification Recall with Pooled Random-Effects Estimate**

**
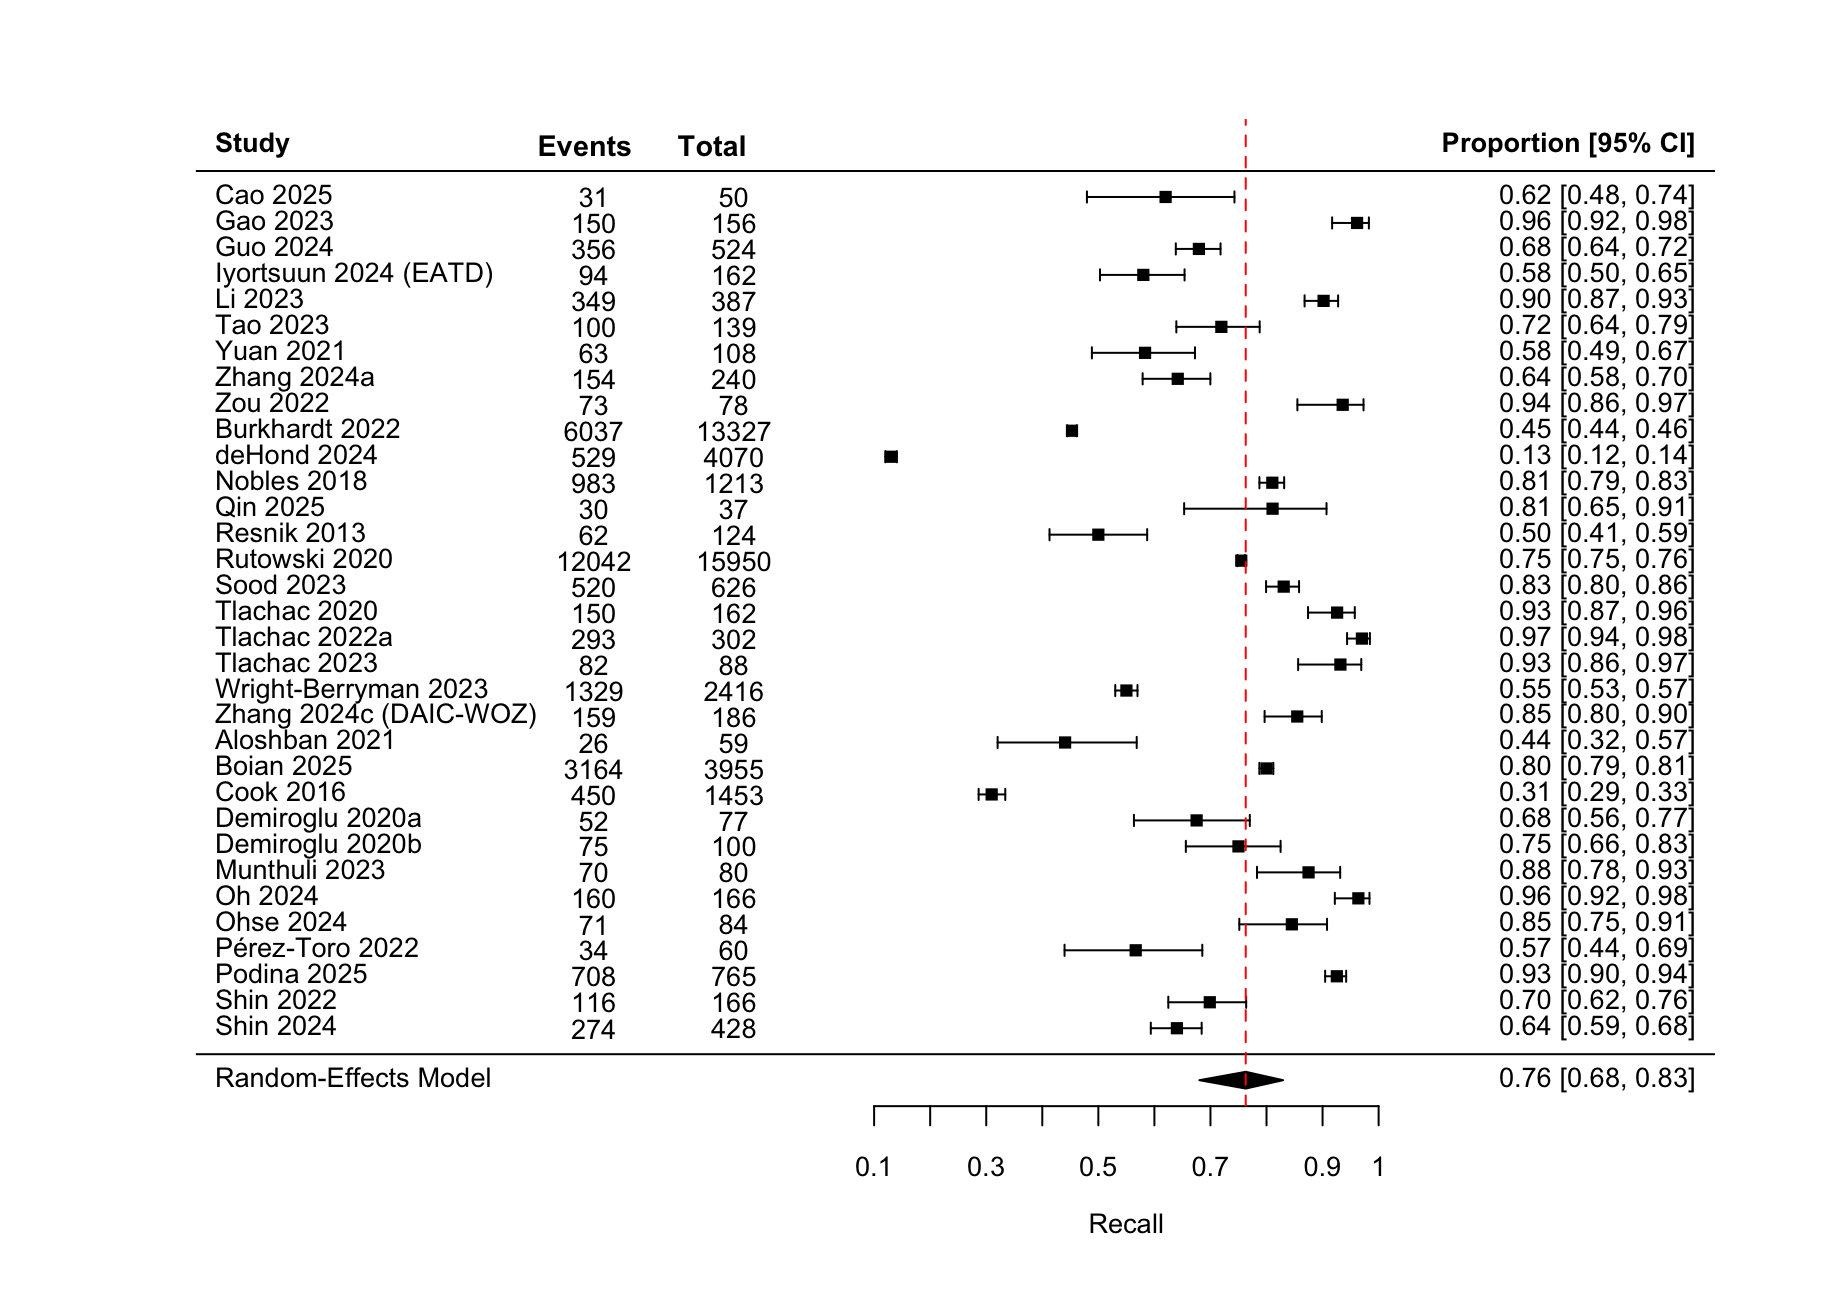
**

**
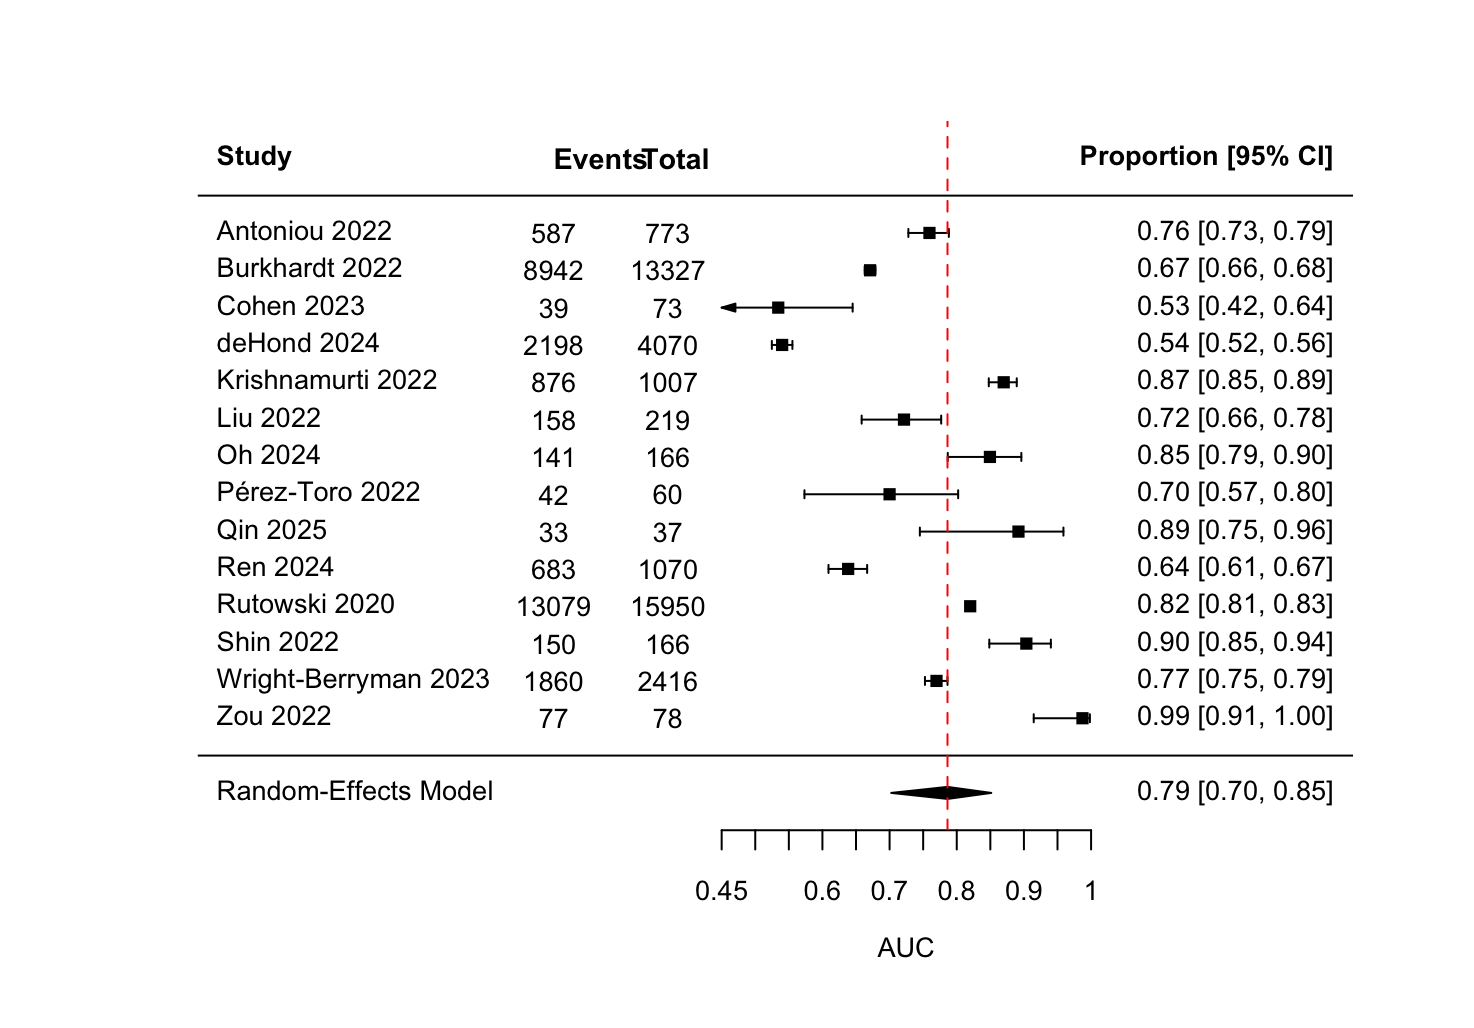
Figure S3. Forest Plot of Study-Level Classification AUC With Pooled Random-Effects Estimate**

**Figure S4. Forest Plot of Study-Level Classification AUC With Pooled Random-Effects Estimate**

**
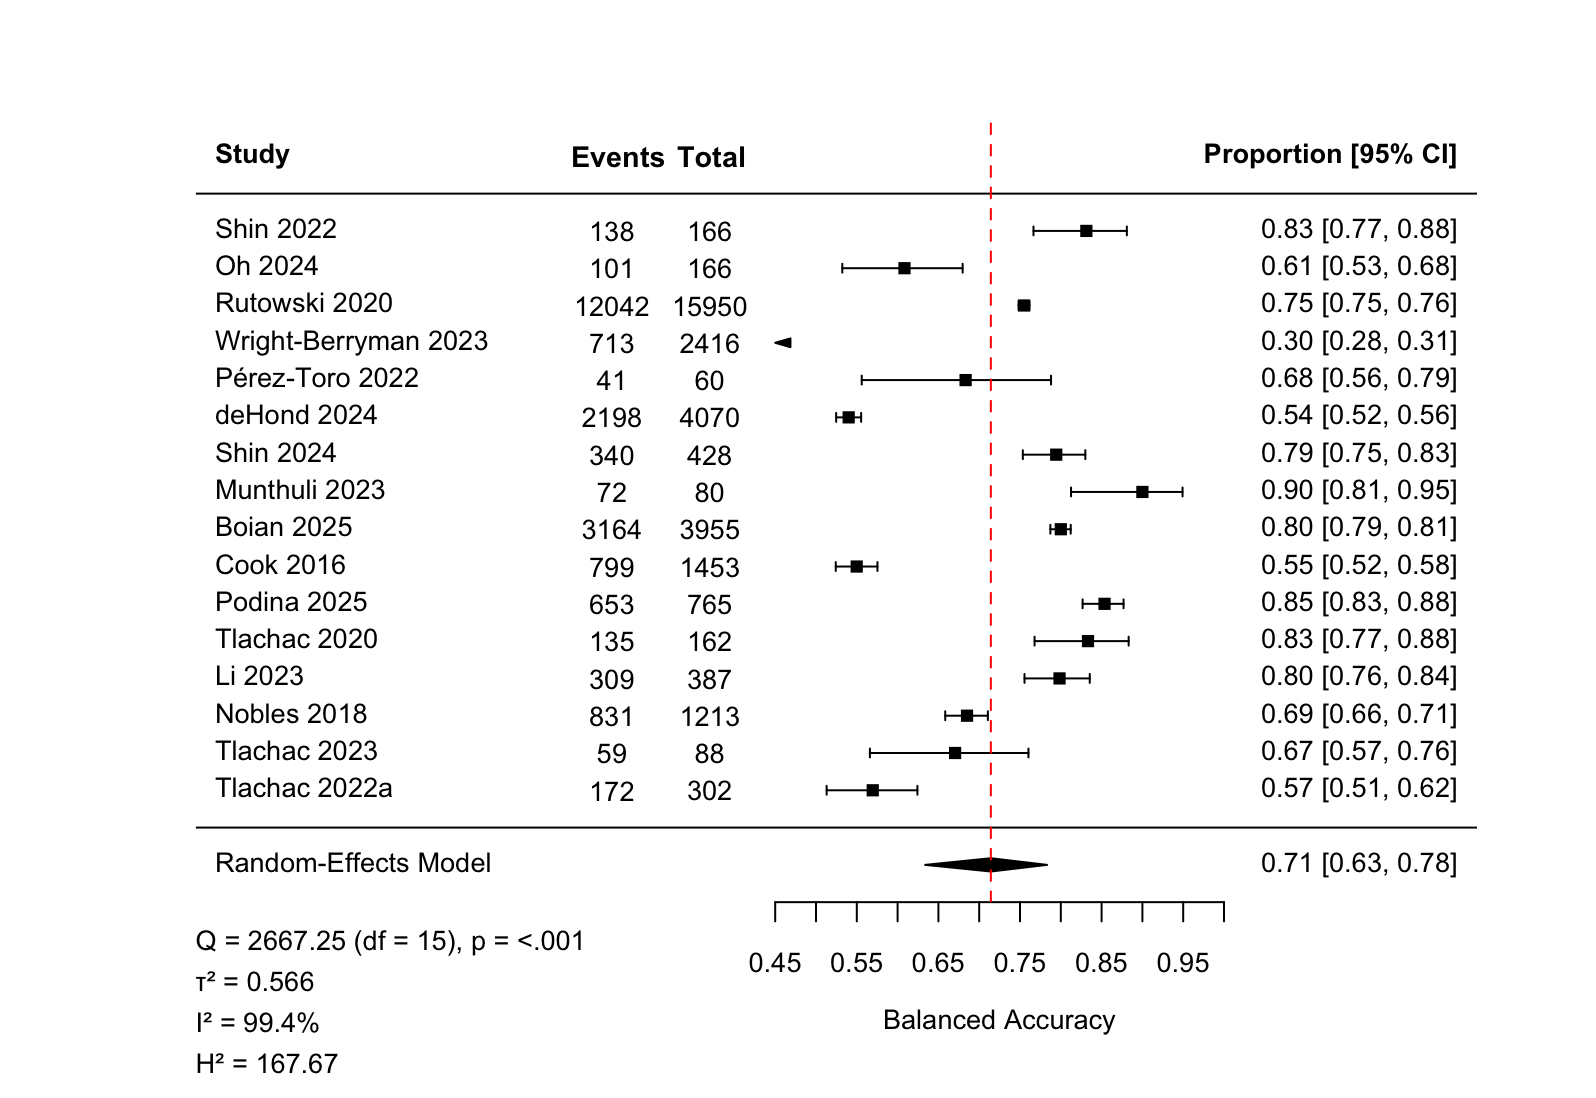
**

**Figure S5. Funnel Plot of Study-Level Classification Balanced Accuracy**

**
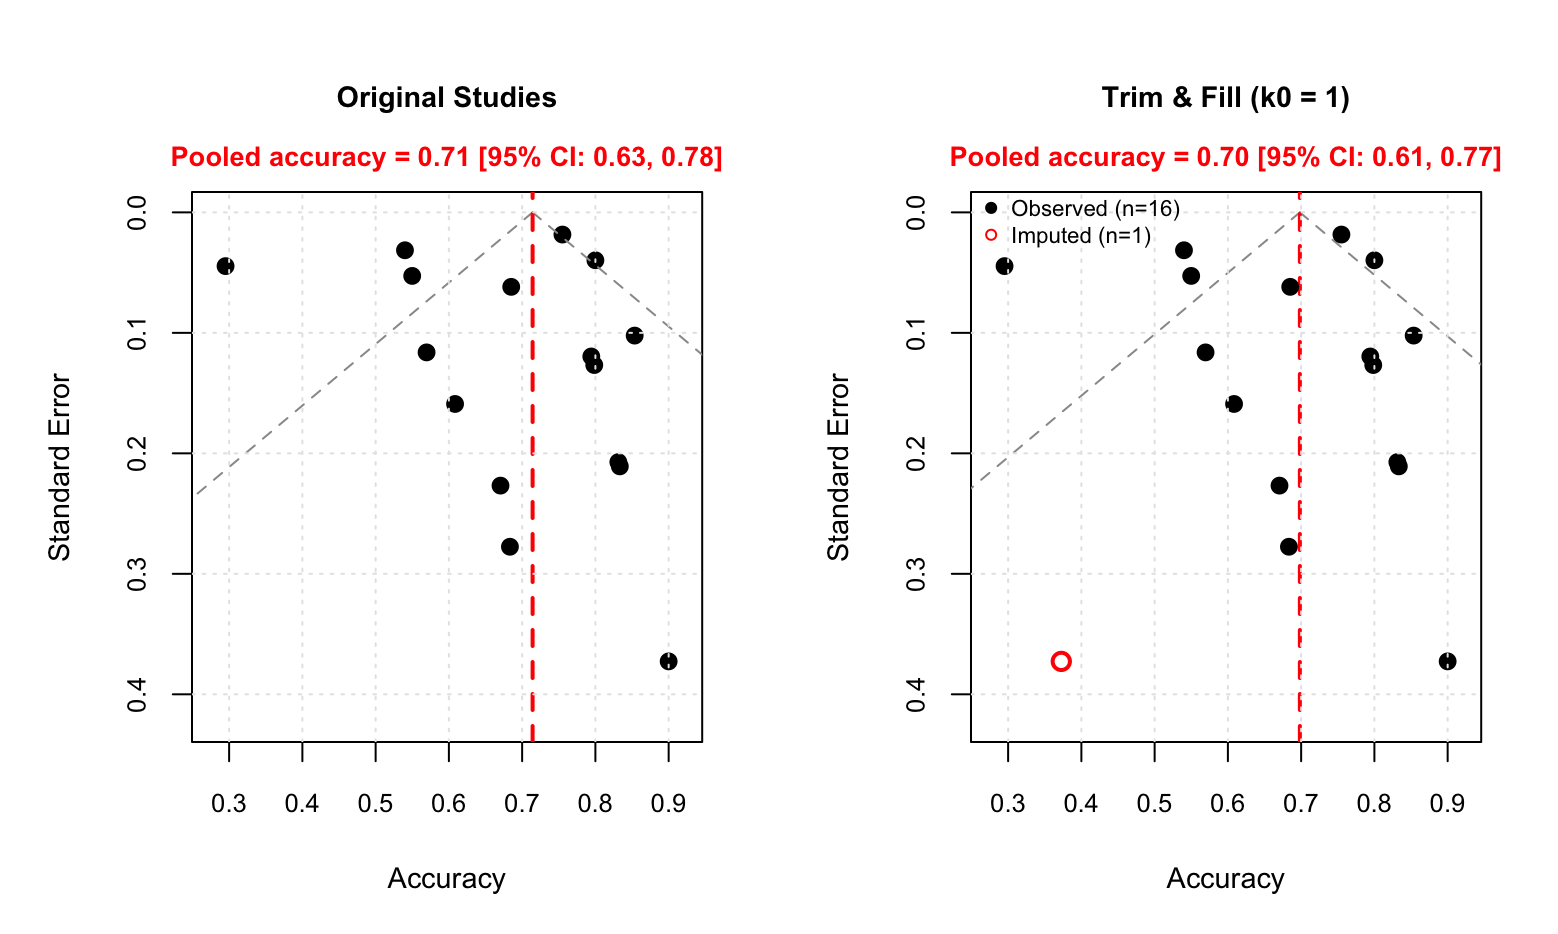
**
